# Supplementary material for: Fabrication of inverse opal molybdenum sulfide and its use as a catalyst for H2 evolution
Source: Royal Society of Chemistry journal article supplement (doi:10.1039/d3ra02972g), 2023-01-01
Supplement: d3ra02972g1.pdf [file d3ra02972g1.pdf]

## Supporting information

### Fabrication of inverse opal molybdenum sulfide and its use as catalyst for H<sub>2</sub> evolution

Thai D. Nguyen,<sup>a</sup> Huong T. Phung,<sup>a,b</sup> Duc N. Nguyen,<sup>a</sup> Anh D. Nguyen,<sup>a\*</sup> Phong D. Tran<sup>a\*</sup>

<sup>a</sup>University of Science and Technology of Hanoi, Vietnam Academy of Science and Technology, 18 Hoang Quoc Viet, Hanoi, Vietnam. Email: [nguyen-duc.anh@usth.edu.vn](mailto:nguyen-duc.anh@usth.edu.vn) and [phong-dinh.tran@usth.edu.vn](mailto:phong-dinh.tran@usth.edu.vn)

<sup>b</sup>Graduated University of Science and Technology, Vietnam Academy of Science and Ttechnology, 18 Hoang Quoc Viet, Hanoi, Vietnam

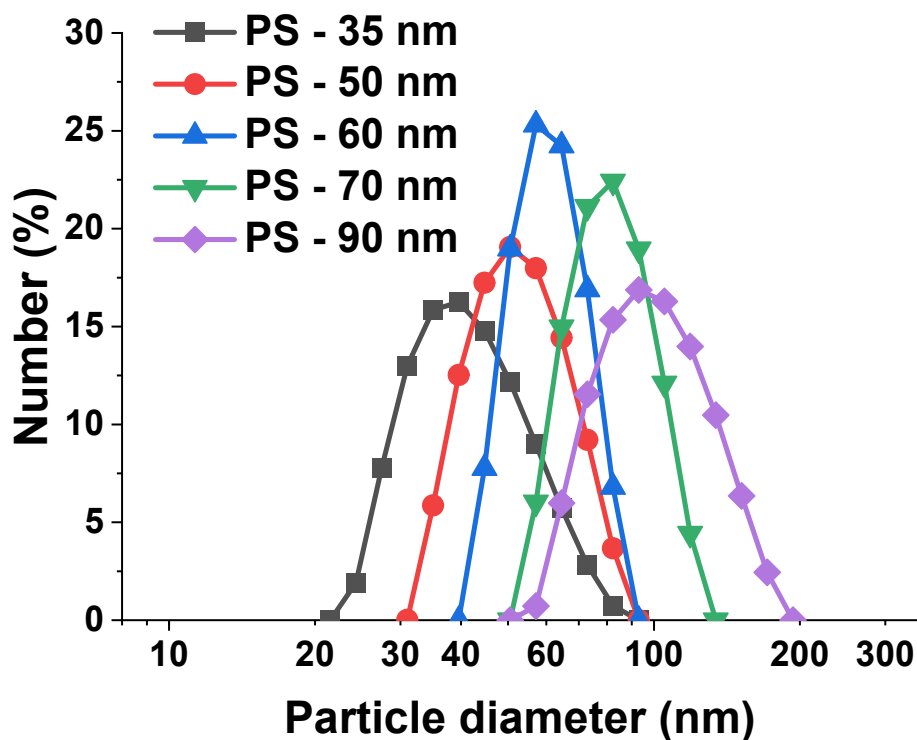

Figure S1. Size distribution of synthetic spherical polystyrene nanoparticles

**Table S1.** Polystyrene particles parameters extracted from SEM and DLS analyses

| No. | Styrene (mL) | MeOH/H <sub>2</sub> O (mL) | KPS (%w/Sty) | SDS (%w/Sty) | Av. Size (nm) (SEM) | Av. Size (nm) (DLS) | PDI (DLS) |
|-----|--------------|----------------------------|--------------|--------------|---------------------|---------------------|-----------|
| 1   | 1.55         | 0/70                       | 2.5          | 6            | 35                  | 39.4                | 0.133     |
| 2   | 1.55         | 0/70                       | 2.5          | 4.5          | 50                  | 50.4                | 0.063     |
| 3   | 1.55         | 0/70                       | 2.5          | 3            | 60                  | 56.0                | 0.113     |
| 4   | 1.55         | 0/70                       | 2.5          | 2            | 70                  | 75.5                | 0.077     |
| 5   | 1.55         | 0/70                       | 2.5          | 1.2          | 90                  | 89.2                | 0.087     |

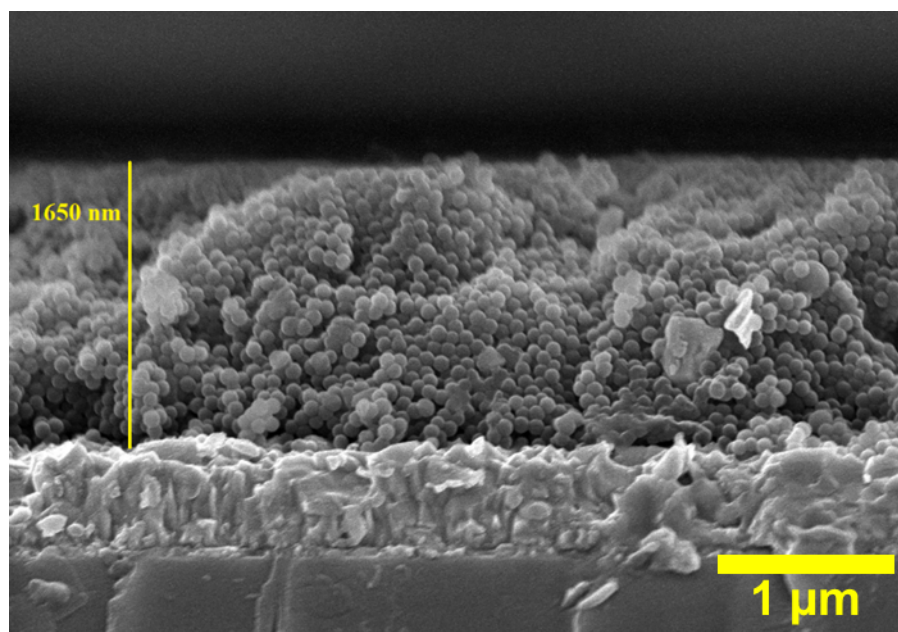

**Figure S2.** SEM cross-section image of PS-90nm beads coated FTO electrode

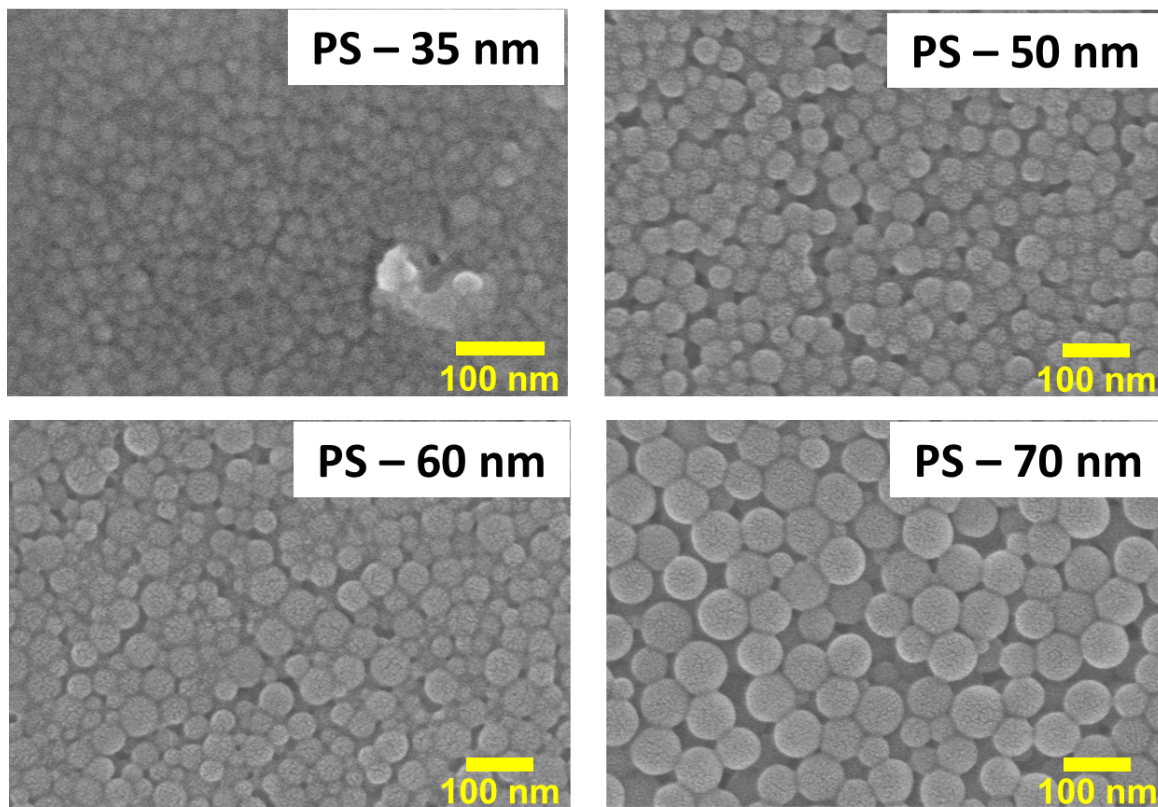

*Figure S3. Surface SEM images of PS-FTO electrodes (using PS particles with different size)*

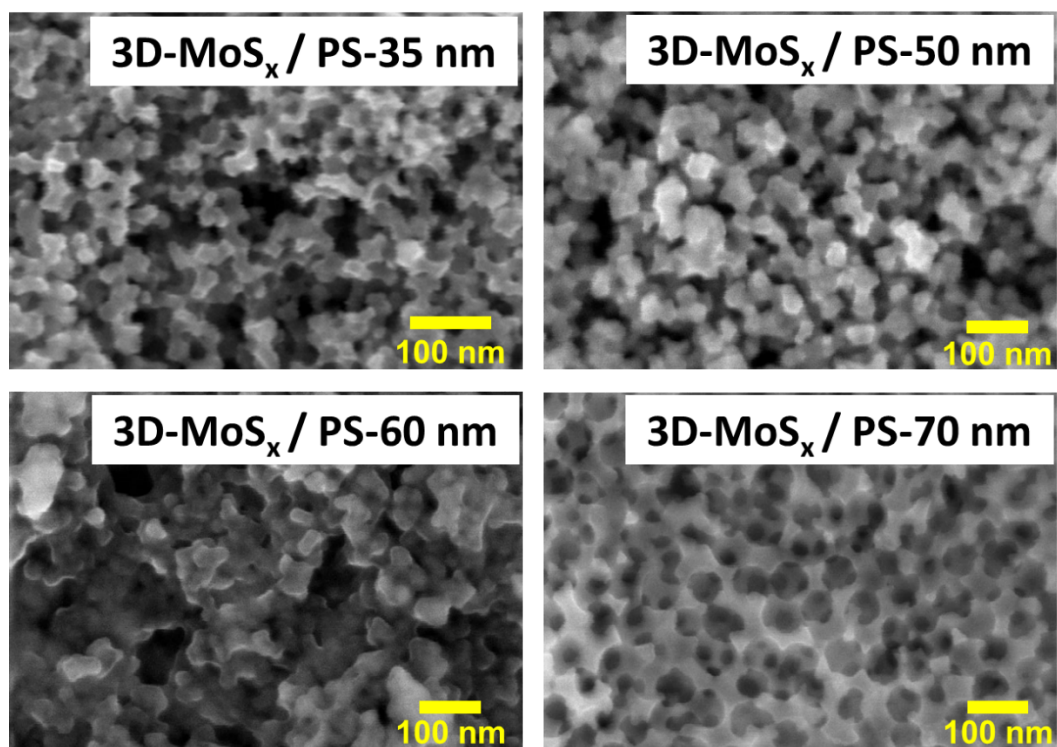

**Figure S4.** Surface SEM images of 3D-MoS<sub>x</sub> films obtained by using 3.53 mC/cm<sup>2</sup> deposition charge and different PS-FTO electrodes (different PS particle size)

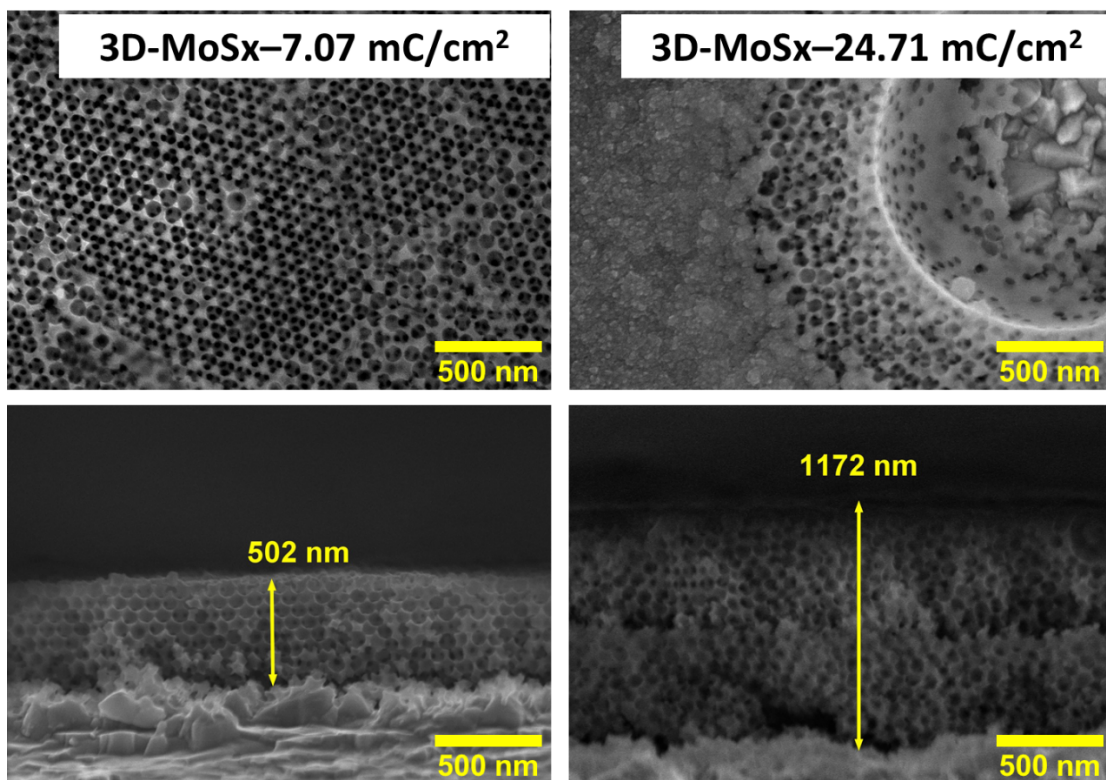

*Figure S5. Surface and cross-section SEM images collected on 3D-MoS<sub>x</sub>-7.07 mC/cm<sup>2</sup> and 3D-MoS<sub>x</sub>-24.71 mC/cm<sup>2</sup>*

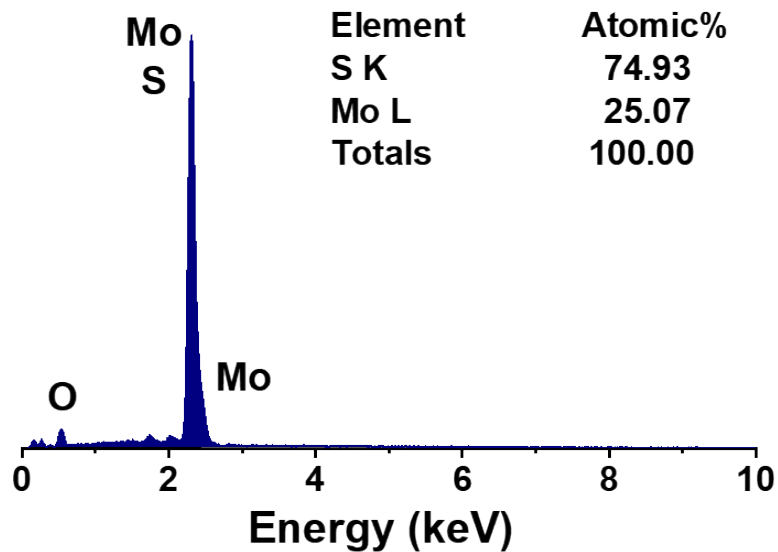

Figure S6. EDX analysis of an as-prepared 3D-MoS<sub>x</sub> film

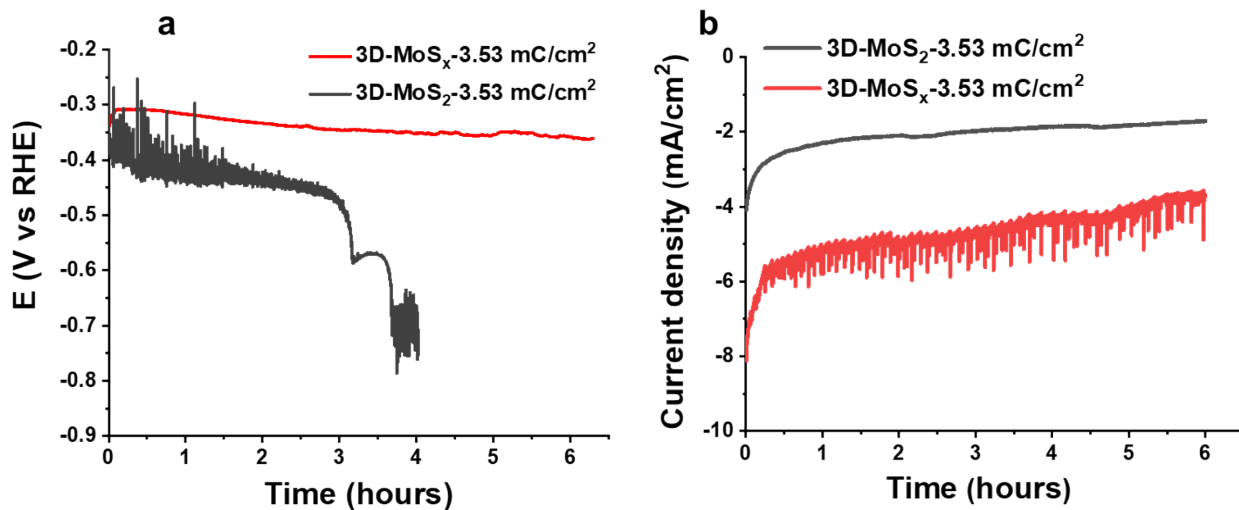

Figure S7. (a) Stability of 3D-MoS<sub>x</sub> and 3D-MoS<sub>2</sub> catalyst electrode assayed by (a) applying a constant catalytic current density of 10 mA/cm<sup>2</sup> and (b) applying a constant cathodic potential of -0.3 V vs RHE for 6 hours. Electrolyte was a 0.5M H<sub>2</sub>SO<sub>4</sub> solution (pH 0.3)

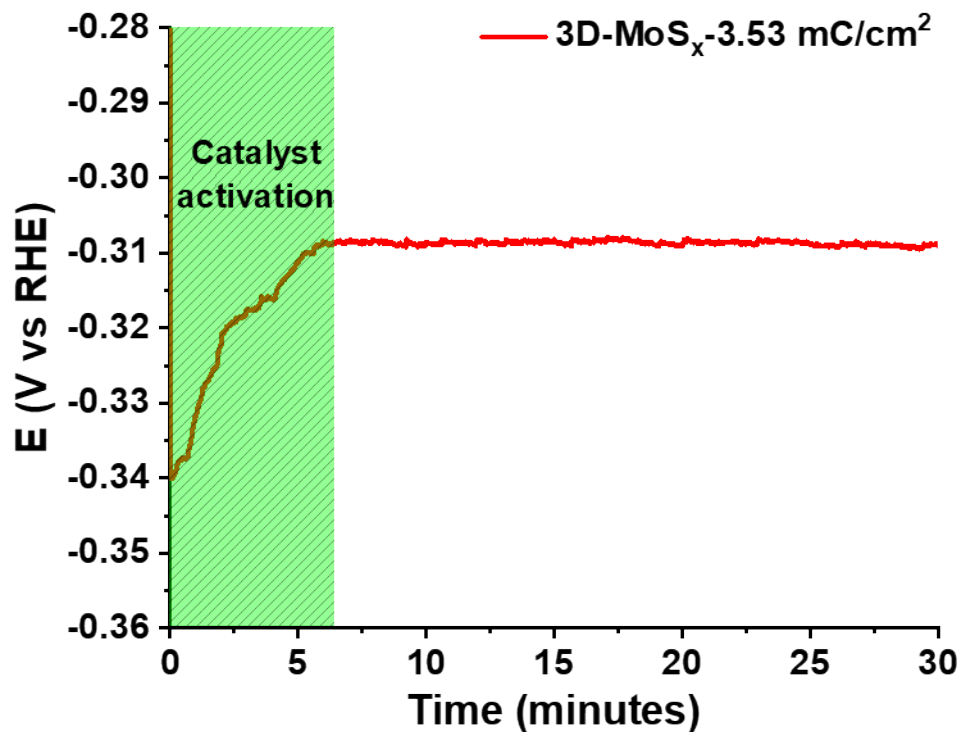

**Figure S8.** *E-t* curve recorded on the 3D-MoS<sub>x</sub>-3.53mC/cm<sup>2</sup> electrode conditioned at a constant catalytic current density of 10 mA/cm<sup>2</sup> in a 0.5M H<sub>2</sub>SO<sub>4</sub> (pH 0.3) electrolyte solution

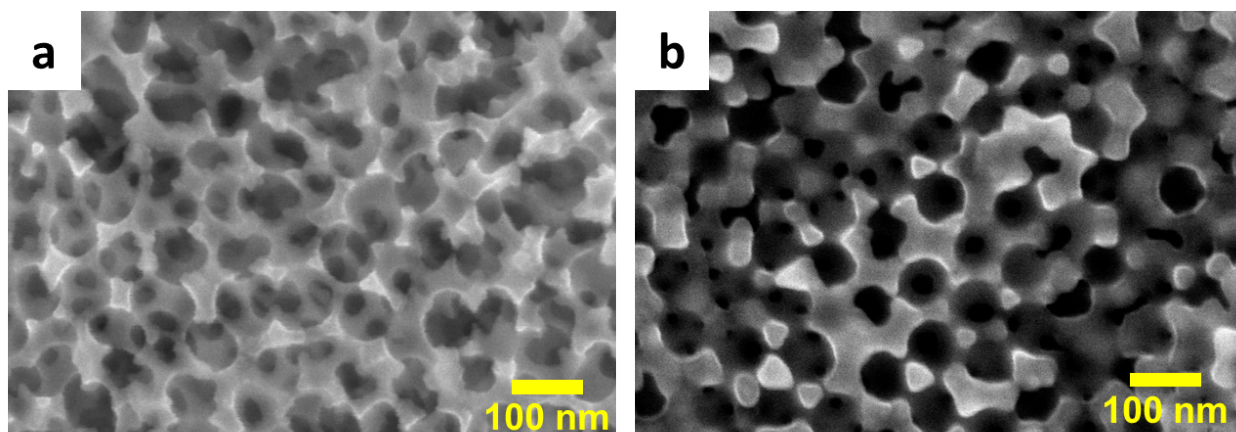

**Figure S9.** Surface SEM images recorded on a (a) 3D-MoS<sub>2</sub> and (b) 3D-MoS<sub>x</sub> film after 6 hours of bulk electrolysis at -0.3V vs. RHE. Electrolyte was a 0.5M H<sub>2</sub>SO<sub>4</sub> solution (pH 0.3)

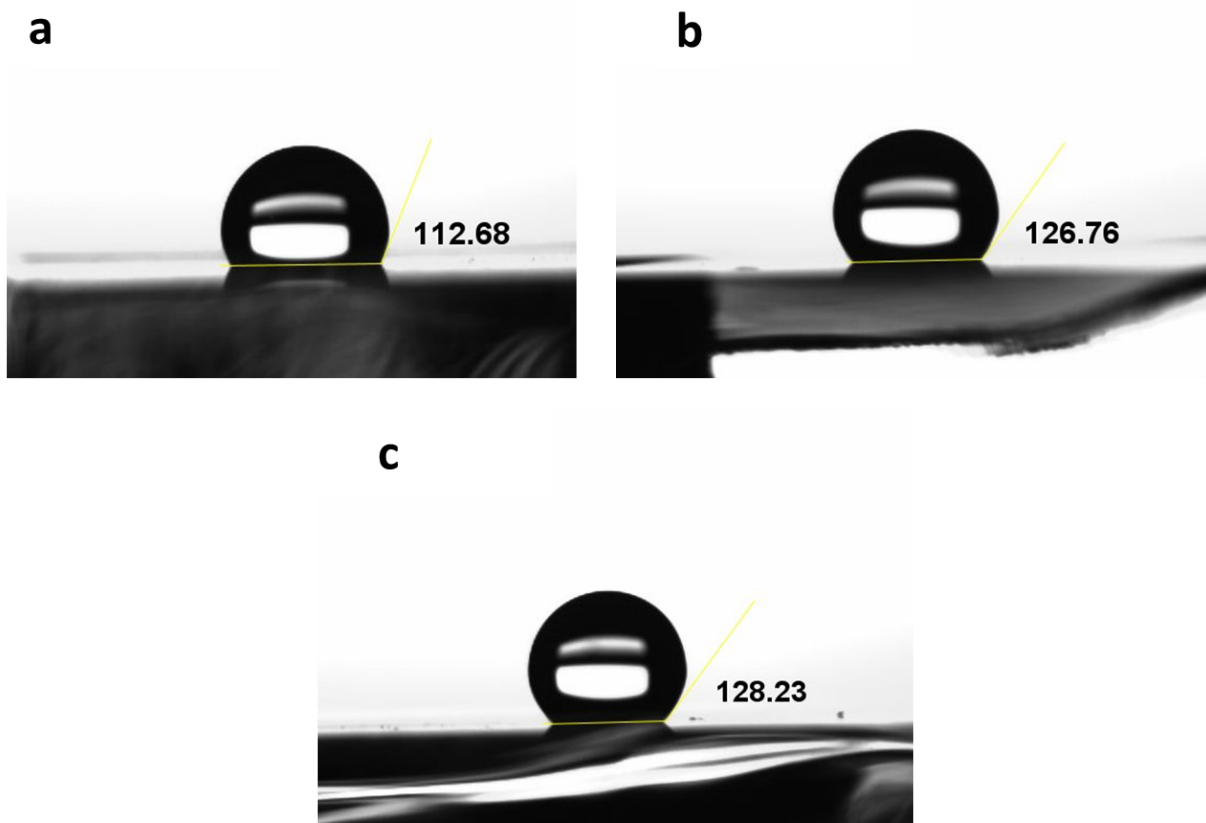

**Figure S10.** Water contact angles determined for (a) a bulk  $\text{MoS}_x$ , (b) a 3D- $\text{MoS}_x$ , and (c) a  $\text{MoS}_2$  film



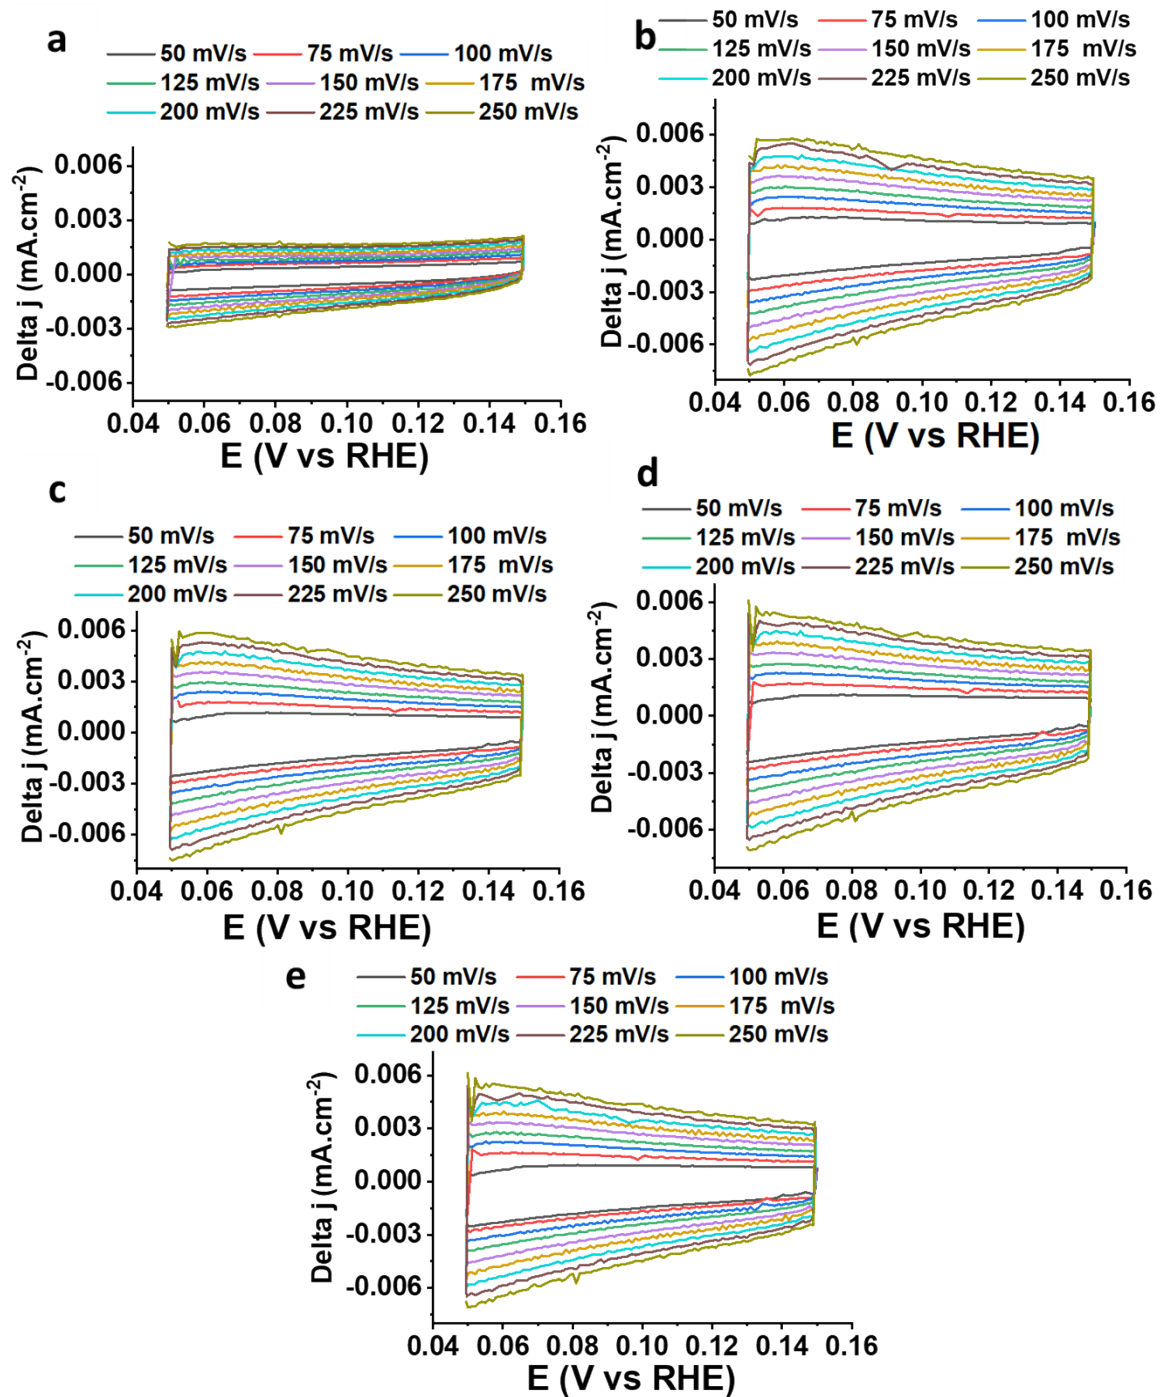

**Figure S11.** Cyclic voltammograms recorded at different potential scan rates in the capacitive current region on: (a) the bulk-MoS<sub>x</sub>-3.53 mC/cm<sup>2</sup>, (b) 3D-MoS<sub>x</sub>-3.53 mC/cm<sup>2</sup>, (c) 3D-MoS<sub>x</sub>-10.59 mC/cm<sup>2</sup>, (d) 3D-MoS<sub>x</sub>-17.75 mC/cm<sup>2</sup>, (e) 3D-MoS<sub>x</sub>-24.71 mC/cm<sup>2</sup>. Electrolyte was a 0.5M H<sub>2</sub>SO<sub>4</sub> solution (pH 0.3)

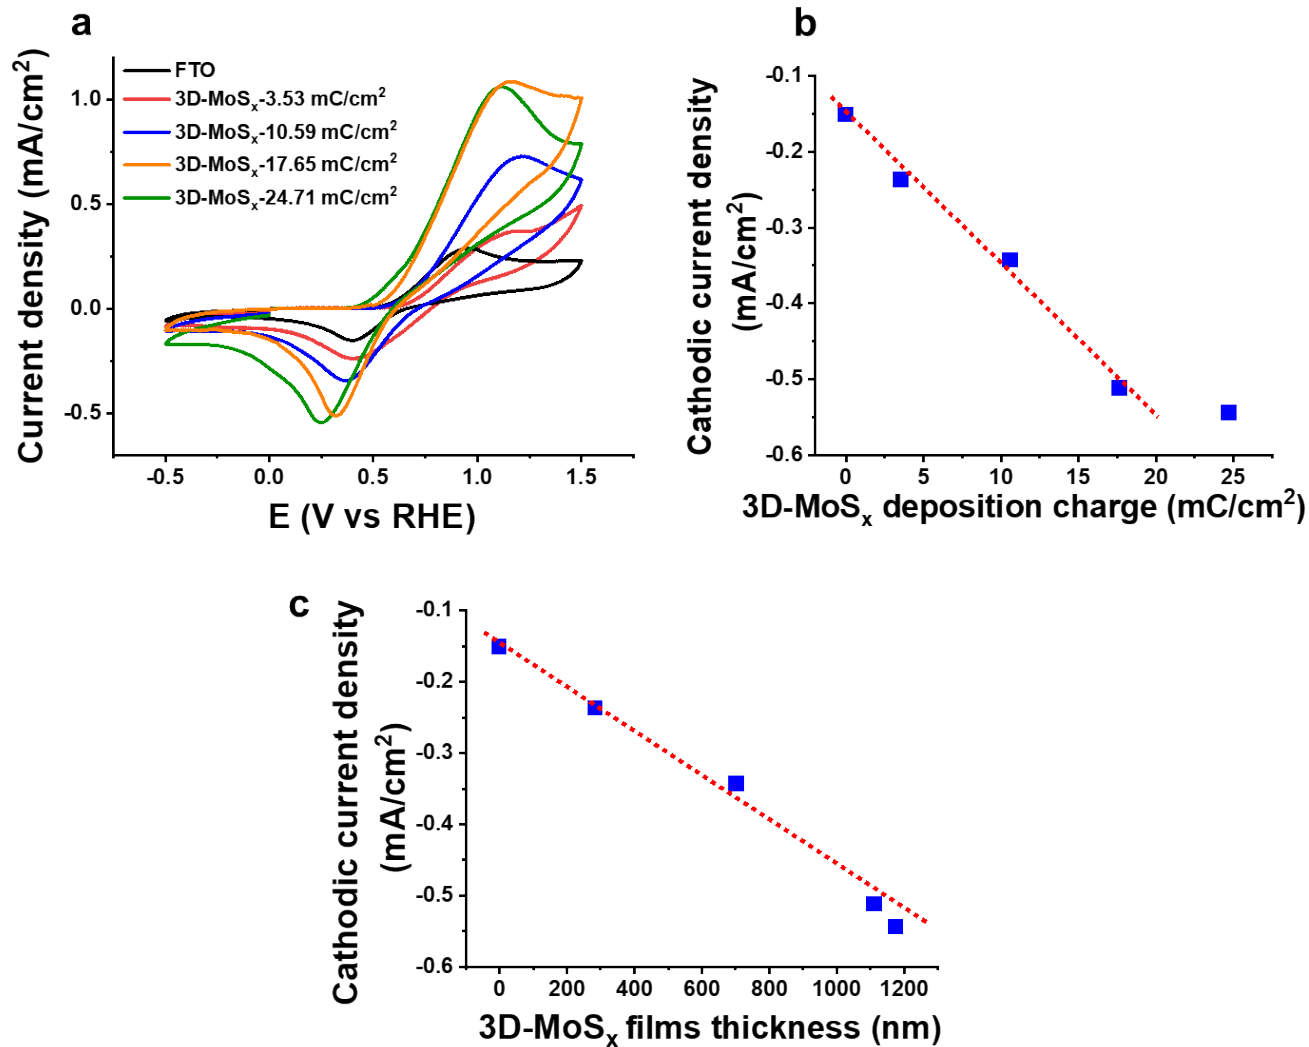

**Figure S12.** (a) Cyclic voltammograms recorded for 1mM ferrocene in DCM (with 0.1M TBATFB electrolyte support) on 3D-MoS<sub>x</sub> with different thickness. Potential scan rate was 50 mV/s. (b) Plotting the cathodic current density of the Fc<sup>+</sup>/Fc couple in function of the 3D-MoS<sub>x</sub> deposition charge density. (c) Plotting the cathodic current density of the Fc<sup>+</sup>/Fc couple in function of the 3D-MoS<sub>x</sub> films thickness

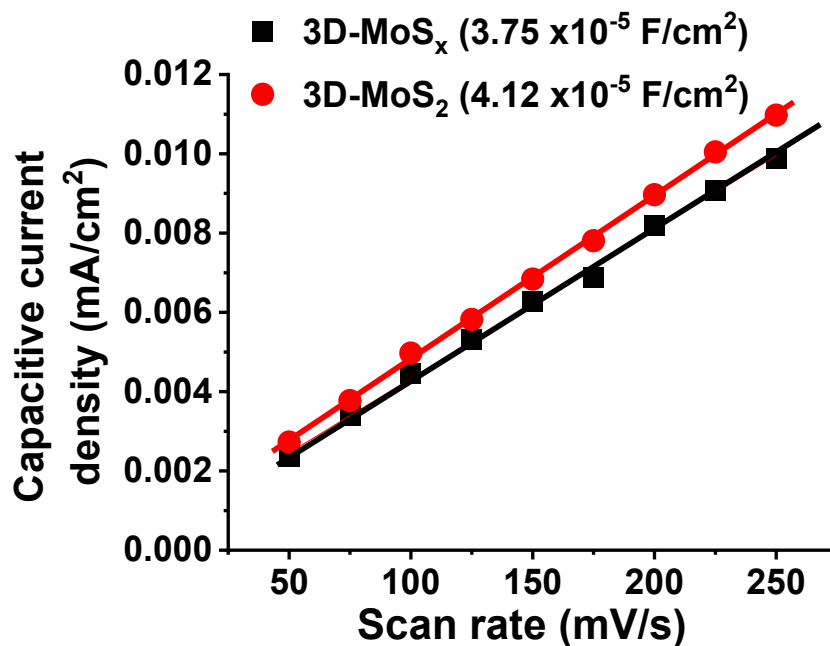

**Figure S13.** Plotting capacitive current density obtained at 0.1 V vs. RHE in function of potential scan rate for 3D-MoS<sub>2</sub>-3.53 mC/cm<sup>2</sup> and 3D-MoS<sub>x</sub>-3.53 mC/cm<sup>2</sup> electrodes

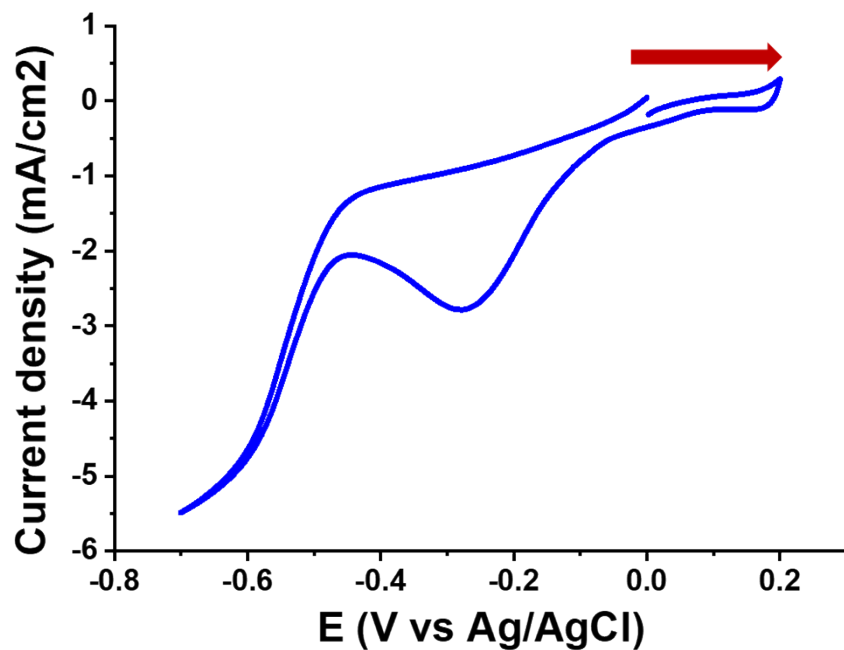

**Figure S14.** Cyclic voltammogram recorded for a solution constituted of 1mM Cu<sub>2</sub>SO<sub>4</sub> and 0.5M H<sub>2</sub>SO<sub>4</sub> employing the 3D-MoS<sub>x</sub>-10.59 mC/cm<sup>2</sup> electrode. Potential scan rate was 50 mV/s toward the anodic direction.

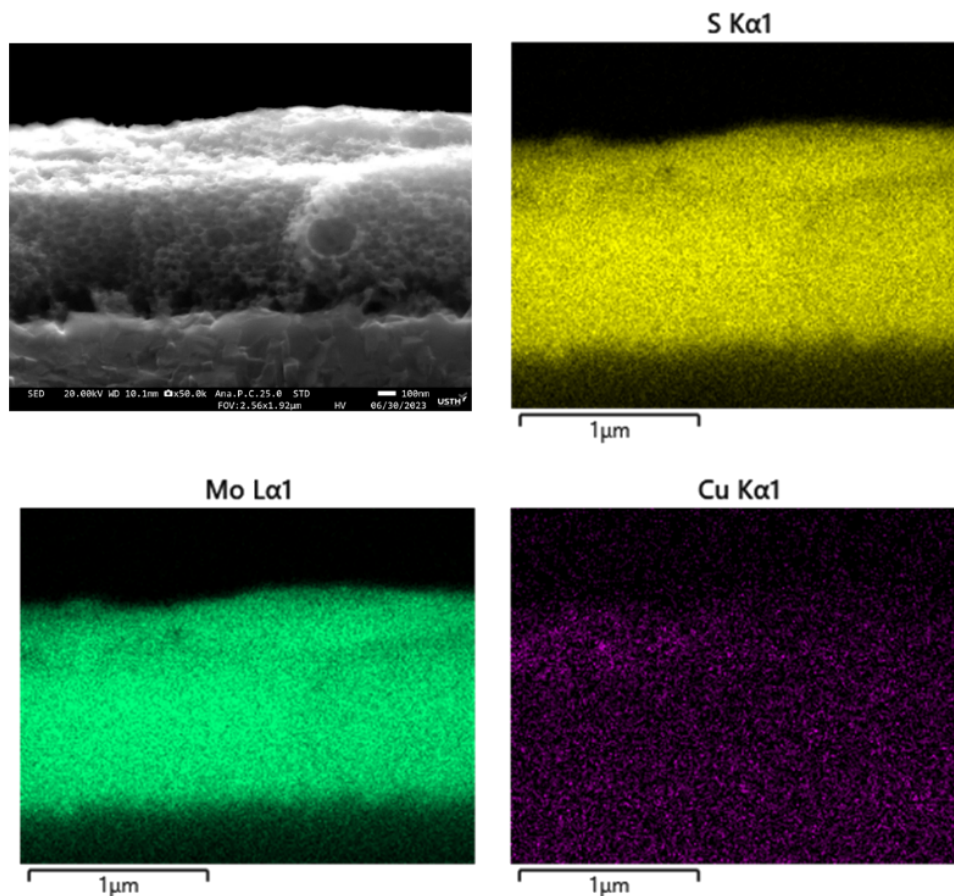

**Figure S15.** EDS elemental mapping (Mo, S and Cu element) on the cross-section of 3D-MoS<sub>x</sub>-10.59 mC/cm<sup>2</sup> film after being conditioned by cycling potential between -0.7 V to 0.2 V vs. Ag/AgCl with a potential scan rate of 50 mV/s. Electrolyte was constituted of 1mM CuSO<sub>4</sub> and 0.5M H<sub>2</sub>SO<sub>4</sub>

**Calculation of theoretical surface area of 3D-MoS<sub>x</sub>**

Assume that the polystyrene particles are homogeneous perfect spheres and the arrangement of PS particles on FTO electrodes forms a hexagonal close-packed lattice structure (Figure S12). Each crystal unit cell contains 6 polystyrene particles.

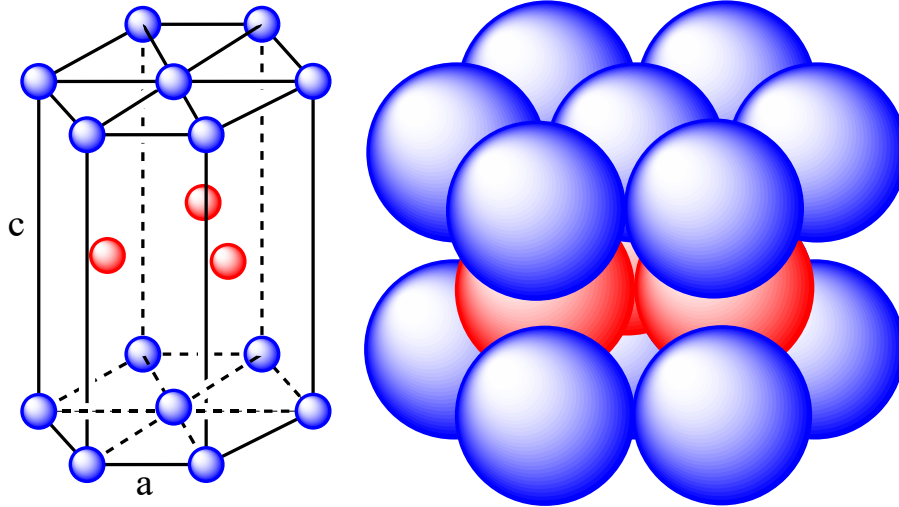

Figure S16. The hexagonal close-packed lattice structural arrangement of PS particles

+ The volume of unit cells is calculated as following:  $V_{\text{unit cell}} = 24\sqrt{2} \cdot R^3 \text{ (nm}^3\text{)}$

+ Assume that the working electrode was prepared with a working area of  $1 \text{ cm}^2$ . The 3D-MoS<sub>x</sub> was electrochemically deposited to the d (nm) of thickness.

The volume of 3D-MoS<sub>x</sub> films will be calculated as:  $V_{(3D-MoS_x)} = (1 \times 10^{14}) \cdot d \text{ (nm}^3\text{)}$

We then calculate the number of polystyrene particles in the deposited volume of 3D-MoS<sub>x</sub> electrodes:

$$\text{Number of polystyrene particles: } N = \frac{V(3D - MoS_x)}{6 V(\text{unit cell})}$$

+ After removal of PS particles template, we can assume that the surface area of each polystyrene particle is equal to the remain surface area of each MoS<sub>x</sub> inverse opal pore. Then the theoretical surface area of 3D-MoS<sub>x</sub> can be defined:

$$S_{\text{theo.}} = N \times \frac{4}{3} \pi R^3$$

The theoretical calculated surface values are presented in the table 2.

**Table 2.** Theoretical calculation of surface area on 3D-MoS<sub>x</sub> samples with geometrical area of  $1.0 \text{ cm}^2$

| <b>Run</b> | <b>Sample</b>                  | <b>Diameter of PS (cm)</b> | <b>Volume of unit cell (cm<sup>3</sup>)</b> | <b>Thickness of deposited film (cm)</b> | <b>Volume of deposited film (cm<sup>3</sup>)</b> | <b>Number of PS particles in film</b> | <b>Surface area of a PS particle (cm<sup>2</sup>)</b> | <b>Theoretical surface area (cm<sup>2</sup>)</b> |
|------------|--------------------------------|----------------------------|---------------------------------------------|-----------------------------------------|--------------------------------------------------|---------------------------------------|-------------------------------------------------------|--------------------------------------------------|
| <b>1</b>   | Bulk MoS <sub>x</sub> *        | 0                          | 0                                           | -                                       | -                                                | -                                     | -                                                     | <b>1.000</b>                                     |
| <b>2</b>   | 3D-MoS <sub>x</sub> -<br>35nm  | 3.5x10 <sup>-6</sup>       | 14.553x10 <sup>-15</sup>                    | 3.0x10 <sup>-5</sup>                    | 3.0x10 <sup>-5</sup>                             | 12.369x10 <sup>10</sup>               | 1.539x10 <sup>-10</sup>                               | <b>19.041</b>                                    |
| <b>3</b>   | 3D-MoS <sub>x</sub> -<br>50 nm | 5.0x10 <sup>-6</sup>       | 42.427x10 <sup>-15</sup>                    | 3.0x10 <sup>-5</sup>                    | 3.0x10 <sup>-5</sup>                             | 4.243x10 <sup>10</sup>                | 3.142x10 <sup>-10</sup>                               | <b>13.328</b>                                    |
| <b>4</b>   | 3D-MoS <sub>x</sub> -<br>60 nm | 6.0x10 <sup>-6</sup>       | 73.314x10 <sup>-15</sup>                    | 3.0x10 <sup>-5</sup>                    | 3.0x10 <sup>-5</sup>                             | 2.455x10 <sup>10</sup>                | 4.524x10 <sup>-10</sup>                               | <b>11.107</b>                                    |
| <b>5</b>   | 3D-MoS <sub>x</sub> -<br>70 nm | 7.0x10 <sup>-6</sup>       | 11.642x10 <sup>-14</sup>                    | 3.0x10 <sup>-5</sup>                    | 3.0x10 <sup>-5</sup>                             | 1.546x10 <sup>10</sup>                | 6.158x10 <sup>-10</sup>                               | <b>9.520</b>                                     |
| <b>6</b>   | 3D-MoS <sub>x</sub> -<br>90 nm | 9.0x10 <sup>-6</sup>       | 24.743x10 <sup>-14</sup>                    | 3.0x10 <sup>-5</sup>                    | 3.0x10 <sup>-5</sup>                             | 7.275x10 <sup>9</sup>                 | 10.179x10 <sup>-9</sup>                               | <b>7.405</b>                                     |
| <b>7</b>   | 3D-MoS <sub>x</sub> -<br>90 nm | 9.0x10 <sup>-6</sup>       | 24.743x10 <sup>-14</sup>                    | 5.0x10 <sup>-5</sup>                    | 5.0x10 <sup>-5</sup>                             | 1.212x10 <sup>10</sup>                | 10.179x10 <sup>-9</sup>                               | <b>12.341</b>                                    |
| <b>8</b>   | 3D-MoS <sub>x</sub> -<br>90 nm | 9.0x10 <sup>-6</sup>       | 24.743x10 <sup>-14</sup>                    | 7.0x10 <sup>-5</sup>                    | 7.0x10 <sup>-5</sup>                             | 1.697x10 <sup>10</sup>                | 10.179x10 <sup>-9</sup>                               | <b>17.278</b>                                    |
| <b>9</b>   | 3D-MoS <sub>x</sub> -<br>90 nm | 9.0x10 <sup>-6</sup>       | 24.743x10 <sup>-14</sup>                    | 11.0x10 <sup>-5</sup>                   | 11.0x10 <sup>-5</sup>                            | 2.667x10 <sup>10</sup>                | 10.179x10 <sup>-9</sup>                               | <b>27.151</b>                                    |

\*The surface area of bulk MoS<sub>x</sub> is considered as geometrical working electrodes area of 1 cm<sup>2</sup>
